# Supplementary material
Source: publisher figshare collection journal article supplement (https://karger.figshare.com/ndownloader/files/17820368)
Supplement: Supplementary file 1 [file 17820368]

Table I. Univariate and multivariate logistic regression analysis for predictors of unsuccessful recanalization with stent retriever only (n=61)

|  | Univariate | |  | Multivariate | |
| --- | --- | --- | --- | --- | --- |
| OR (95% CI) | P-value | OR (95% CI) | P-value |
| Female | 3.73 (1.17–12.0) | 0.027 |  | 3.51 (0.77–16.0) | 0.11 |
| Hypertension | 7.64 (1.56–37.3) | 0.012 |  | 8.92 (1.27–62.8) | 0.028 |
| M2-3 occlusion | 2.07 (0.67–6.37) | 0.20 |  | 8.52 (1.14–63.6) | 0.037 |
| Puncture to recanalization per 10-min increase | 1.26 (1.10–1.45) | 0.001 |  | 1.44 (1.12–1.85) | 0.005 |

OR, odds ratio; CI, confidence interval; M2-3, M2 or M3 segment of the middle cerebral artery.

Table II. Univariate and multivariate logistic regression analysis for predictors of unsuccessful recanalization with other techniques (ADAPT or combined technique using both stent retriever and aspiration catheter) (n=58)

|  | Univariate | |  | Multivariate | |
| --- | --- | --- | --- | --- | --- |
| OR (95% CI) | P-value | OR (95% CI) | P-value |
| Female | 3.08 (0.82–11.5) | 0.095 |  | 3.36 (0.78–14.5) | 0.10 |
| Hypertension | 2.67 (0.65–11.0) | 0.18 |  | 2.84 (0.57–14.2) | 0.21 |
| M2-3 occlusion | 2.41 (0.58–10.1) | 0.23 |  | 2.66 (0.53–13.3) | 0.24 |
| Puncture to recanalization per 10-min increase | 1.14 (1.02–1.27) | 0.022 |  | 1.12 (1.01–1.25) | 0.035 |

ADAPT, a direct aspiration first pass technique; OR, odds ratio; CI, confidence interval; M2-3, M2 or M3 segment of the middle cerebral artery.

Table III. Univariate and multivariate logistic regression analysis for predictors of unsuccessful recanalization for operators with more than five years of experience (n=69)

|  | Univariate | |  | Multivariate | |
| --- | --- | --- | --- | --- | --- |
| OR (95% CI) | P-value | OR (95% CI) | P-value |
| Female | 2.35 (0.82–6.86) | 0.11 |  | 2.44 (0.71–8.39) | 0.16 |
| Hypertension | 2.32 (0.67–8.03) | 0.18 |  | 2.37 (0.56–10.0) | 0.24 |
| M2-3 occlusion | 3.19 (1.04–9.80) | 0.043 |  | 5.66 (1.32–24.2) | 0.019 |
| Puncture to recanalization per 10-min increase | 1.17 (1.04–1.31) | 0.007 |  | 1.22 (1.06–1.42) | 0.007 |

OR, odds ratio; CI, confidence interval; M2-3, M2 or M3 segment of the middle cerebral artery.

Table IV. Univariate and multivariate logistic regression analysis for predictors of unsuccessful recanalization for operators without more than five years of neuroradiological experience (n=50)

|  | Univariate | |  | Multivariate | |
| --- | --- | --- | --- | --- | --- |
| OR (95% CI) | P-value | OR (95% CI) | P-value |
| Female | 7.20 (1.37–38.0) | 0.020 |  | 3.35 (0.51–22.2) | 0.21 |
| Hypertension | 14.4 (1.67–124.0) | 0.015 |  | 25.6 (1.01–654.0) | 0.050 |
| M2-3 occlusion | 1.45 (0.35–5.97) | 0.60 |  | 2.25 (0.36–14.2) | 0.39 |
| Puncture to recanalization per 10-min increase | 1.17 (1.03–1.33) | 0.015 |  | 1.19 (1.03–1.38) | 0.020 |

OR, odds ratio; CI, confidence interval; M2-3, M2 or M3 segment of the middle cerebral artery.
